# Supplementary material
Source: PubMed Central journal article supplement (PMC9329262)
Supplement: NIHMS1811090-supplement-1811090_Sup_info.pdf [file NIHMS1811090-supplement-1811090_Sup_info.pdf]

## **Supplementary information**

### **Performance of plasma phosphorylated tau 181 and 217 in the community**

Michelle M. Mielke, PhD<sup>1,2,3</sup>, Jeffrey L. Dage, PhD<sup>4</sup>, Ryan D. Frank, MS<sup>5</sup>, Alicia Algeciras-Schimnich, PhD<sup>6</sup>, David S. Knopman, MD<sup>2</sup>, Val J. Lowe, MD<sup>7</sup>, Guojun Bu, PhD<sup>8</sup>, Prashanthi Vemuri, PhD<sup>7</sup>, Jonathan Graff-Radford, MD<sup>2</sup>, Clifford R. Jack Jr, MD<sup>7</sup>, Ronald C. Petersen, MD, PhD<sup>1,2</sup>

**Supplementary Table 1** Corresponding pair-wise associations for plasma P-tau181 and P-tau217 levels by amyloid (A) and tau (T) PET

**Supplementary Table 2** Predictive accuracy of continuous plasma P-tau181 and P-tau217, and age, sex, and *APOE* for predicting abnormal amyloid PET

**Supplementary Table 3** Predictive accuracy of continuous Plasma P-tau181 and P-tau217, and age, sex, and *APOE* for predicting abnormal tau PET temporal meta region of interest

**Supplementary Table 4** Predictive accuracy of continuous Plasma P-tau181 and P-tau217, and age, sex, and *APOE* for predicting abnormal entorhinal cortex (ERC) tau PET region of interest

**Supplementary Table 5** Associations with plasma P-tau181 using unadjusted and multivariable linear regression models

**Supplementary Table 6** Associations with plasma P-tau217 using unadjusted and multivariable linear regression models

**Supplementary Table 7** Age and sex-adjusted associations with P-tau 181 and P-tau 217 by clinical diagnosis

**Supplementary Table 1 | Corresponding pair-wise associations for plasma P-tau181 and P-tau217 levels by amyloid (A) and tau (T) PET**

|          | A-T-              | A+T-              | A-T+              | A+T+              | Overall<br>p-value | A-T- vs<br>A+T- | A-T- vs<br>A-T+ | A-T- vs<br>A+T+ | A+T-<br>vs<br>A-T+ | A+T-<br>vs<br>A+T+ | A-T+<br>vs<br>A+T+ |  |
|----------|-------------------|-------------------|-------------------|-------------------|--------------------|-----------------|-----------------|-----------------|--------------------|--------------------|--------------------|--|
| All      |                   |                   |                   |                   |                    |                 |                 |                 |                    |                    |                    |  |
| N        | 296               | 88                | 54                | 56                |                    |                 |                 |                 |                    |                    |                    |  |
| P-tau181 | 0.88 (0.71, 1.03) | 1.05 (0.89, 1.47) | 0.82 (0.69, 1.01) | 1.47 (1.13, 1.91) | <.001              | <.001           | 0.347           | <.001           | <.001              | <.001              | <.001              |  |
| P-tau217 | 0.12 (0.10, 0.15) | 0.20 (0.14, 0.26) | 0.13 (0.10, 0.17) | 0.29 (0.19, 0.42) | <.001              | <.001           | 0.157           | <.001           | <.001              | <.001              | <.001              |  |
| CU       |                   |                   |                   |                   |                    |                 |                 |                 |                    |                    |                    |  |
| N        | 281               | 82                | 52                | 46                |                    |                 |                 |                 |                    |                    |                    |  |
| P-tau181 | 0.88 (0.72, 1.03) | 1.05 (0.90, 1.47) | 0.82 (0.69, 1.02) | 1.42 (1.19, 1.73) | <.001              | <.001           | 0.389           | <.001           | <.001              | <.001              | <.001              |  |
| P-tau217 | 0.12 (0.10, 0.15) | 0.19 (0.14, 0.26) | 0.13 (0.10, 0.17) | 0.28 (0.18, 0.36) | <.001              | <.001           | 0.119           | <.001           | <.001              | <.001              | <.001              |  |
| MCI      |                   |                   |                   |                   |                    |                 |                 |                 |                    |                    |                    |  |
| N        | 15                | 6                 | 2                 | 9                 |                    |                 |                 |                 |                    |                    |                    |  |
| P-tau181 | 0.89 (0.63, 1.03) | 1.00 (0.74, 1.38) | 0.80 (0.72, 0.87) | 2.02 (1.00, 2.74) | <.001              | 0.119           | 0.35            | <.001           | 0.161              | 0.02               | 0.017              |  |
| P-tau217 | 0.14 (0.11, 0.16) | 0.22 (0.12, 0.25) | 0.12 (0.11, 0.13) | 0.43 (0.24, 0.54) | <.001              | 0.058           | 0.41            | <.001           | 0.161              | 0.02               | 0.018              |  |

CU, cognitively unimpaired; MCI, Mild cognitive impairment. P-values are from two-sided Kruskal -Wallis tests (for the overall p-value) and Wilcoxon rank sum tests for the pairwise tests. The p-values were not adjusted for multiple comparisons.

**Supplementary Table 2 | Predictive accuracy of continuous plasma P-tau181 and P-tau217, and age, sex, and APOE for predicting abnormal amyloid PET**

| Variable (s)                | All AUROC            | CU only AUROC        | MCI only AUROC       |
|-----------------------------|----------------------|----------------------|----------------------|
| Unadjusted                  |                      |                      |                      |
| P-tau181                    | 0.805 (0.777, 0.834) | 0.784 (0.751, 0.817) | 0.840 (0.775, 0.904) |
| P-tau217                    | 0.855 (0.831, 0.880) | 0.837 (0.808, 0.867) | 0.884 (0.828, 0.939) |
| Age Adjusted                |                      |                      |                      |
| Age                         | 0.751 (0.723, 0.780) | 0.735 (0.703, 0.767) | 0.737 (0.640, 0.835) |
| Age + P-tau181              | 0.841 (0.817, 0.865) | 0.820 (0.791, 0.848) | 0.870 (0.807, 0.933) |
| Age + P-tau217              | 0.878 (0.856, 0.899) | 0.860 (0.834, 0.886) | 0.903 (0.852, 0.953) |
| Age + Sex Adjusted          |                      |                      |                      |
| Age + Sex                   | 0.754 (0.726, 0.783) | 0.738 (0.706, 0.770) | 0.741 (0.643, 0.838) |
| Age + Sex + P-tau181        | 0.842 (0.819, 0.866) | 0.821 (0.793, 0.849) | 0.872 (0.809, 0.935) |
| Age + Sex + P-tau217        | 0.880 (0.858, 0.901) | 0.863 (0.837, 0.888) | 0.903 (0.851, 0.954) |
| Age + Sex + APOE Adjusted   |                      |                      |                      |
| Age + Sex + APOE            | 0.808 (0.782, 0.834) | 0.788 (0.758, 0.819) | 0.815 (0.728, 0.902) |
| Age + Sex + APOE + P-tau181 | 0.859 (0.836, 0.881) | 0.839 (0.812, 0.866) | 0.884 (0.823, 0.945) |
| Age + Sex + APOE + P-tau217 | 0.886 (0.865, 0.907) | 0.869 (0.844, 0.894) | 0.910 (0.859, 0.960) |

Abnormal amyloid PET was defined as standard uptake value ratio (SUVR)>1.48 using PiB-PET.

AUROC, Area under the receiver operating characteristic; CU, cognitively unimpaired; MCI, mild cognitive impairment.

**Supplementary Table 3 | Predictive accuracy of continuous plasma P-tau181 and P-tau217, and age, sex, and APOE for predicting abnormal tau PET temporal meta region of Interest\***

| Variable(s)                 | All AUROC            | CU only AUROC        | MCI only AUROC       |
|-----------------------------|----------------------|----------------------|----------------------|
| Unadjusted                  |                      |                      |                      |
| P-tau181                    | 0.660 (0.580, 0.739) | 0.650 (0.566, 0.734) | 0.681 (0.425, 0.937) |
| P-tau217                    | 0.694 (0.616, 0.771) | 0.684 (0.600, 0.767) | 0.715 (0.463, 0.967) |
| Age Adjusted                |                      |                      |                      |
| Age                         | 0.784 (0.731, 0.837) | 0.772 (0.714, 0.829) | 0.797 (0.627, 0.967) |
| Age + P-tau181              | 0.797 (0.743, 0.851) | 0.786 (0.727, 0.845) | 0.836 (0.674, 0.997) |
| Age + P-tau217              | 0.800 (0.747, 0.852) | 0.788 (0.731, 0.846) | 0.816 (0.652, 0.980) |
| Age + Sex Adjusted          |                      |                      |                      |
| Age + Sex                   | 0.788 (0.736, 0.839) | 0.776 (0.721, 0.832) | 0.787 (0.614, 0.960) |
| Age + Sex + P-tau181        | 0.800 (0.747, 0.852) | 0.789 (0.732, 0.845) | 0.831 (0.671, 0.991) |
| Age + Sex + P-tau217        | 0.803 (0.751, 0.854) | 0.793 (0.738, 0.848) | 0.816 (0.650, 0.983) |
| Age + Sex + APOE Adjusted   |                      |                      |                      |
| Age + Sex + APOE            | 0.788 (0.737, 0.840) | 0.776 (0.720, 0.832) | 0.792 (0.621, 0.963) |
| Age + Sex + APOE + P-tau181 | 0.801 (0.749, 0.853) | 0.791 (0.735, 0.847) | 0.826 (0.660, 0.992) |
| Age + Sex + APOE + P-tau217 | 0.806 (0.756, 0.857) | 0.797 (0.742, 0.851) | 0.821 (0.655, 0.987) |

Abnormal tau PET meta region of interest (ROI) was defined as standard uptake value ratio (SUVR) $\geq$ 1.29 using AV1451, and included the amygdala, entorhinal cortex, fusiform, parahippocampal, and inferior temporal and middle temporal gyri. AUROC, Area under the receiver operating characteristic; CU, cognitively unimpaired; MCI, mild cognitive impairment.

**Supplementary Table 4 | Predictive accuracy of continuous plasma P-tau181 and P-tau217, and age, sex, and APOE for predicting abnormal entorhinal cortex (ERC) tau PET region of interest**

| Variable                    | All AUROC            | CU only AUROC        | MCI only AUROC       |
|-----------------------------|----------------------|----------------------|----------------------|
| Unadjusted                  |                      |                      |                      |
| P-tau181                    | 0.827 (0.760, 0.894) | 0.814 (0.738, 0.890) | 0.870 (0.702, 1.000) |
| P-tau217                    | 0.857 (0.794, 0.919) | 0.842 (0.770, 0.915) | 0.911 (0.775, 1.000) |
| Age Adjusted                |                      |                      |                      |
| Age                         | 0.801 (0.750, 0.851) | 0.777 (0.722, 0.833) | 0.891 (0.776, 1.000) |
| Age + P-tau181              | 0.887 (0.848, 0.926) | 0.873 (0.829, 0.917) | 0.953 (0.887, 1.000) |
| Age + P-tau217              | 0.893 (0.853, 0.932) | 0.880 (0.835, 0.924) | 0.943 (0.867, 1.000) |
| Age + Sex Adjusted          |                      |                      |                      |
| Age + Sex                   | 0.800 (0.748, 0.852) | 0.776 (0.719, 0.834) | 0.891 (0.777, 1.000) |
| Age + Sex + P-tau181        | 0.886 (0.844, 0.927) | 0.871 (0.823, 0.919) | 0.948 (0.873, 1.000) |
| Age + Sex + P-tau217        | 0.889 (0.845, 0.932) | 0.875 (0.825, 0.925) | 0.943 (0.863, 1.000) |
| Age + Sex + APOE Adjusted   |                      |                      |                      |
| Age + Sex + APOE            | 0.805 (0.754, 0.855) | 0.779 (0.722, 0.837) | 0.922 (0.830, 1.000) |
| Age + Sex + APOE + P-tau181 | 0.885 (0.843, 0.927) | 0.869 (0.821, 0.918) | 0.948 (0.866, 1.000) |
| Age + Sex + APOE + P-tau217 | 0.887 (0.843, 0.931) | 0.873 (0.823, 0.924) | 0.948 (0.866, 1.000) |

Abnormal ERC tau PET was defined as standard uptake value ratio (SUVR)  $\geq 1.27$  using AV1451.

AUROC, Area under the receiver operating characteristic; CU, cognitively unimpaired; MCI, mild cognitive impairment.

**Supplementary Table 5 | Associations with plasma P-tau181 using unadjusted and multivariable linear regression models**

| Characteristic                | Unadjusted           |         | Age+Sex Adjusted     |         | Age+Sex+Amyloid PET Adjusted |         | Without CKD Age+Sex Adjusted |         |
|-------------------------------|----------------------|---------|----------------------|---------|------------------------------|---------|------------------------------|---------|
|                               | Mean (95% CI)        | p-value | Mean (95% CI)        | p-value | Mean (95% CI)                | p-value | Mean (95% CI)                | p-value |
| Education, per 5 years        | -0.08 (-0.12, -0.05) | <.001   | -0.02 (-0.05, 0.02)  | 0.334   | -0.01 (-0.04, 0.02)          | 0.549   | 0.01 (-0.01, 0.04)           | 0.310   |
| Any ApoE E4                   | 0.21 (0.16, 0.25)    | <.001   | 0.22 (0.18, 0.26)    | <.001   | 0.01 (-0.03, 0.06)           | 0.601   | 0.22 (0.19, 0.25)            | <.001   |
| BMI <18.5 (ref 18.5-24.9)     | 0.06 (-0.21, 0.33)   | 0.67    | -0.00 (-0.27, 0.26)  | 0.968   | 0.03 (-0.21, 0.28)           | 0.790   | 0.06 (-0.12, 0.24)           | 0.476   |
| BMI 25.0-29.9 (ref 18.5-24.9) | -0.08 (-0.12, -0.03) | 0.002   | -0.06 (-0.11, -0.02) | 0.007   | -0.03 (-0.07, 0.02)          | 0.236   | -0.09 (-0.12, -0.06)         | <.001   |
| BMI 30.0-34.9 (ref 18.5-24.9) | -0.19 (-0.25, -0.13) | <.001   | -0.14 (-0.20, -0.09) | <.001   | -0.12 (-0.18, -0.07)         | <.001   | -0.12 (-0.16, -0.08)         | <.001   |
| BMI 35.0-39.9 (ref 18.5-24.9) | -0.20 (-0.29, -0.12) | <.001   | -0.09 (-0.18, -0.01) | 0.032   | -0.06 (-0.15, 0.02)          | 0.143   | -0.14 (-0.20, -0.08)         | <.001   |
| BMI 40+ (ref 18.5-24.9)       | -0.29 (-0.42, -0.15) | <.001   | -0.08 (-0.21, 0.06)  | 0.264   | -0.04 (-0.18, 0.09)          | 0.537   | -0.13 (-0.23, -0.04)         | 0.005   |
| BDI depression                | 0.04 (-0.04, 0.12)   | 0.34    | 0.03 (-0.05, 0.11)   | 0.471   | 0.03 (-0.05, 0.11)           | 0.401   | 0.02 (-0.04, 0.07)           | 0.601   |
| BAI total score, per 5        | 0.06 (0.03, 0.08)    | <.001   | 0.05 (0.02, 0.07)    | <.001   | 0.02 (-0.01, 0.04)           | 0.140   | 0.05 (0.03, 0.07)            | <.001   |
| Current/former smoker         | -0.03 (-0.07, 0.01)  | 0.18    | -0.07 (-0.11, -0.03) | <.001   | -0.07 (-0.10, -0.03)         | <.001   | -0.04 (-0.07, -0.02)         | <.001   |
| Charlson score, per 5         | 0.28 (0.25, 0.31)    | <.001   | 0.16 (0.12, 0.19)    | <.001   | 0.14 (0.10, 0.17)            | <.001   | 0.11 (0.09, 0.14)            | <.001   |
| HTN                           | 0.31 (0.27, 0.35)    | <.001   | 0.12 (0.07, 0.16)    | <.001   | 0.10 (0.06, 0.14)            | <.001   | 0.07 (0.04, 0.10)            | <.001   |
| CKD                           | 0.57 (0.50, 0.63)    | <.001   | 0.45 (0.39, 0.52)    | <.001   | 0.60 (0.53, 0.66)            | <.001   | -                            | -       |
| Dyslipidemia                  | 0.18 (0.13, 0.22)    | <.001   | -0.02 (-0.07, 0.03)  | 0.350   | -0.02 (-0.07, 0.03)          | 0.420   | -0.03 (-0.06, 0.00)          | 0.060   |
| DM                            | 0.11 (0.06, 0.16)    | <.001   | 0.02 (-0.03, 0.07)   | 0.378   | 0.04 (-0.01, 0.09)           | 0.077   | 0.02 (-0.02, 0.05)           | 0.310   |
| Stroke                        | 0.34 (0.27, 0.41)    | <.001   | 0.20 (0.13, 0.27)    | <.001   | 0.16 (0.10, 0.23)            | <.001   | -0.03 (-0.08, 0.02)          | 0.303   |
| MI                            | 0.37 (0.31, 0.42)    | <.001   | 0.25 (0.19, 0.31)    | <.001   | 0.23 (0.18, 0.29)            | <.001   | 0.15 (0.11, 0.19)            | <.001   |
| AFib                          | 0.26 (0.20, 0.32)    | <.001   | 0.11 (0.05, 0.16)    | <.001   | 0.09 (0.04, 0.15)            | 0.001   | 0.11 (0.06, 0.15)            | <.001   |
| Head trauma                   | 0.10 (0.07, 0.14)    | <.001   | 0.06 (0.03, 0.09)    | <.001   | 0.02 (-0.01, 0.05)           | 0.153   | 0.10 (0.07, 0.13)            | <.001   |
| Cancer                        | 0.15 (0.11, 0.19)    | <.001   | -0.00 (-0.04, 0.04)  | 0.992   | -0.01 (-0.06, 0.03)          | 0.532   | 0.03 (0.00, 0.06)            | 0.034   |
| Chemotherapy for cancer tx    | 0.03 (-0.03, 0.08)   | 0.33    | -0.01 (-0.06, 0.05)  | 0.800   | -0.06 (-0.11, -0.02)         | 0.007   | -0.01 (-0.07, 0.04)          | 0.639   |
| A+                            | 0.63 (0.59, 0.67)    | <.001   | 0.54 (0.50, 0.58)    | <.001   | 0.07 (0.01, 0.12)            | 0.017   | 0.51 (0.48, 0.53)            | <.001   |

A+, Elevated amyloid PET; AFib, atrial fibrillation; BAI total, Beck Anxiety Inventory; BDI dep, Beck Depression Inventory; BMI, body mass index; Chemotherapy for cancer tx, chemotherapy for those with a cancer diagnosis; CKD, chronic kidney disease; DM, diabetes mellitus; HTN, hypertension; MI, myocardial infarction.

P-values are from a 2-sided likelihood ratio test performed in a linear regression model. The p-values are not adjusted for multiple comparisons.

**Supplementary Table 6 | Associations with plasma P-tau 217 using unadjusted and multivariable linear regression models**

| Characteristic                | Unadjusted           |         | Age+Sex Adjusted     |         | Age+Sex+Amyloid PET Adjusted |         | Without CKD, Age+Sex Adjusted |         |
|-------------------------------|----------------------|---------|----------------------|---------|------------------------------|---------|-------------------------------|---------|
|                               | Mean (95% CI)        | p-value | Mean (95% CI)        | p-value | Mean (95% CI)                | p-value | Mean (95% CI)                 | p-value |
| Education, per 5 years        | -0.10 (-0.13, -0.06) | <.001   | -0.03 (-0.06, 0.01)  | 0.130   | -0.02 (-0.05, 0.01)          | 0.251   | 0.01 (-0.01, 0.04)            | 0.302   |
| Any ApoE E4                   | 0.27 (0.23, 0.32)    | <.001   | 0.28 (0.24, 0.33)    | <.001   | 0.02 (-0.03, 0.06)           | 0.490   | 0.29 (0.26, 0.32)             | <.001   |
| BMI <18.5 (ref 18.5-24.9)     | 0.04 (-0.24, 0.32)   | 0.760   | -0.02 (-0.29, 0.25)  | 0.900   | 0.02 (-0.23, 0.27)           | 0.863   | 0.05 (-0.15, 0.25)            | 0.640   |
| BMI 25.0-29.9 (ref 18.5-24.9) | -0.11 (-0.16, -0.06) | <.001   | -0.10 (-0.15, -0.06) | <.001   | -0.06 (-0.10, -0.01)         | 0.01    | -0.14 (-0.17, -0.11)          | <.001   |
| BMI 30.0-34.9 (ref 18.5-24.9) | -0.26 (-0.32, -0.21) | <.001   | -0.21 (-0.27, -0.16) | <.001   | -0.20 (-0.25, -0.14)         | <.001   | -0.20 (-0.25, -0.16)          | <.001   |
| BMI 35.0-39.9 (ref 18.5-24.9) | -0.23 (-0.32, -0.14) | <.001   | -0.12 (-0.21, -0.03) | 0.016   | -0.09 (-0.17, -0.00)         | 0.038   | -0.13 (-0.19, -0.06)          | <.001   |
| BMI 40+ (ref 18.5-24.9)       | -0.40 (-0.54, -0.26) | <.001   | -0.18 (-0.32, -0.05) | 0.007   | -0.16 (-0.30, -0.02)         | 0.019   | -0.24 (-0.35, -0.14)          | <.001   |
| BDI depression                | 0.05 (-0.04, 0.13)   | 0.277   | 0.04 (-0.05, 0.12)   | 0.401   | 0.04 (-0.04, 0.12)           | 0.353   | 0.02 (-0.05, 0.08)            | 0.591   |
| BAI total score, per 5        | 0.06 (0.03, 0.08)    | <.001   | 0.05 (0.02, 0.07)    | <.001   | 0.01 (-0.02, 0.03)           | 0.500   | 0.05 (0.03, 0.07)             | <.001   |
| Current/former smoker         | -0.04 (-0.08, -0.00) | 0.045   | -0.09 (-0.13, -0.05) | <.001   | -0.09 (-0.12, -0.05)         | <.001   | -0.06 (-0.09, -0.03)          | <.001   |
| Charlson score, per 5         | 0.28 (0.25, 0.31)    | <.001   | 0.15 (0.11, 0.18)    | <.001   | 0.12 (0.09, 0.16)            | <.001   | 0.15 (0.12, 0.17)             | <.001   |
| HTN                           | 0.25 (0.21, 0.30)    | <.001   | 0.04 (-0.00, 0.09)   | 0.076   | 0.02 (-0.03, 0.06)           | 0.452   | 0.01 (-0.02, 0.04)            | 0.556   |
| CKD                           | 0.40 (0.33, 0.47)    | <.001   | 0.27 (0.20, 0.34)    | <.001   | 0.45 (0.39, 0.52)            | <.001   | -                             | -       |
| Dyslipidemia                  | 0.18 (0.13, 0.23)    | <.001   | -0.03 (-0.08, 0.02)  | 0.281   | -0.02 (-0.07, 0.03)          | 0.350   | -0.04 (-0.07, -0.00)          | 0.040   |
| DM                            | 0.11 (0.06, 0.17)    | <.001   | 0.02 (-0.03, 0.07)   | 0.424   | 0.05 (0.00, 0.10)            | 0.041   | 0.02 (-0.02, 0.06)            | 0.413   |
| Stroke                        | 0.33 (0.26, 0.41)    | <.001   | 0.18 (0.11, 0.25)    | <.001   | 0.14 (0.07, 0.20)            | <.001   | -0.01 (-0.06, 0.05)           | 0.846   |
| MI                            | 0.37 (0.31, 0.43)    | <.001   | 0.24 (0.18, 0.30)    | <.001   | 0.23 (0.17, 0.29)            | <.001   | 0.16 (0.11, 0.20)             | <.001   |
| AFib                          | 0.25 (0.19, 0.32)    | <.001   | 0.09 (0.03, 0.15)    | 0.005   | 0.07 (0.02, 0.13)            | 0.011   | 0.13 (0.08, 0.17)             | <.001   |
| Head trauma                   | 0.13 (0.09, 0.16)    | <.001   | 0.09 (0.05, 0.12)    | <.001   | 0.04 (0.01, 0.06)            | 0.024   | 0.11 (0.08, 0.15)             | <.001   |
| Cancer                        | 0.17 (0.12, 0.21)    | <.001   | 0.01 (-0.04, 0.05)   | 0.735   | -0.01 (-0.05, 0.04)          | 0.767   | 0.03 (-0.00, 0.07)            | 0.057   |
| Chemotherapy for cancer tx    | 0.06 (-0.01, 0.12)   | 0.082   | 0.02 (-0.04, 0.09)   | 0.455   | -0.07 (-0.12, -0.02)         | 0.004   | 0.04 (-0.02, 0.11)            | 0.223   |
| A+                            | 0.75 (0.71, 0.79)    | <.001   | 0.66 (0.62, 0.71)    | <.001   | 0.05 (-0.01, 0.11)           | 0.083   | 0.62 (0.59, 0.65)             | <.001   |

A+, Elevated amyloid PET; AFib, atrial fibrillation; BAI total, Beck Anxiety Inventory; BDI dep, Beck Depression Inventory; BMI, body mass index; Chemotherapy for cancer tx, chemotherapy for those with a cancer diagnosis; CKD, chronic kidney disease; DM, diabetes mellitus; HTN, hypertension; MI, myocardial infarction. P-values are from a two-sided likelihood ratio test performed in a linear regression model. The p-values are not adjusted for multiple comparisons.

Supplementary Table 7 | Age and sex-adjusted associations with P-tau 181 and P-tau 217 by clinical diagnosis

| Characteristic                | P-tau 181            |         |                     |         | P-tau 217            |         |                     |         |
|-------------------------------|----------------------|---------|---------------------|---------|----------------------|---------|---------------------|---------|
|                               | CU only              |         | MCI/DEM             |         | CU only              |         | MCI/DEM             |         |
|                               | Mean (95% CI)        | P-value | Mean (95% CI)       | P-value | Mean (95% CI)        | P-value | Mean (95% CI)       | P-value |
| Age, per 10 years             | 0.11 (0.09, 0.13)    | <.001   | 0.48 (0.11, 0.84)   | 0.014   | 0.10 (0.09, 0.12)    | <.001   | 0.50 (0.14, 0.87)   | 0.007   |
| Male sex                      | 0.02 (-0.04, 0.07)   | 0.520   | 0.24 (-0.47, 0.95)  | 0.513   | 0.03 (-0.02, 0.09)   | 0.229   | 0.18 (-0.53, 0.89)  | 0.629   |
| Education, per 5 years        | 0.01 (-0.04, 0.07)   | 0.650   | 0.00 (-0.60, 0.60)  | 0.989   | 0.01 (-0.05, 0.06)   | 0.778   | -0.06 (-0.66, 0.54) | 0.845   |
| Any ApoE E4                   | 0.12 (0.06, 0.19)    | <.001   | 0.15 (-0.58, 0.87)  | 0.689   | 0.18 (0.12, 0.25)    | <.001   | 0.15 (-0.57, 0.88)  | 0.677   |
| BMI <18.5 (ref 18.5-24.9)     | -0.23 (-0.65, 0.20)  | 0.289   | 1.50 (-3.08, 6.08)  | 0.518   | -0.25 (-0.66, 0.17)  | 0.250   | 1.39 (-3.17, 5.95)  | 0.549   |
| BMI 25.0-29.9 (ref 18.5-24.9) | -0.07 (-0.14, -0.00) | 0.043   | 0.23 (-0.58, 1.03)  | 0.578   | -0.10 (-0.16, -0.03) | 0.006   | 0.14 (-0.66, 0.94)  | 0.730   |
| BMI 30.0-34.9 (ref 18.5-24.9) | -0.10 (-0.18, -0.02) | 0.012   | -0.35 (-1.36, 0.67) | 0.500   | -0.15 (-0.23, -0.07) | <.001   | -0.50 (-1.51, 0.51) | 0.330   |
| BMI 35.0-39.9 (ref 18.5-24.9) | -0.12 (-0.23, -0.00) | 0.046   | 0.31 (-2.36, 2.99)  | 0.820   | -0.11 (-0.22, 0.00)  | 0.064   | 0.49 (-2.17, 3.15)  | 0.720   |
| BMI 40+ (ref 18.5-24.9)       | -0.11 (-0.26, 0.05)  | 0.180   | 0.10 (-2.02, 2.22)  | 0.933   | -0.16 (-0.31, -0.00) | 0.041   | -0.32 (-2.43, 1.79) | 0.771   |
| BDI depression                | -0.01 (-0.13, 0.11)  | 0.878   | -0.28 (-1.36, 0.80) | 0.620   | -0.00 (-0.12, 0.12)  | 0.936   | -0.32 (-1.40, 0.75) | 0.563   |
| BAI total score, per 5        | 0.01 (-0.03, 0.05)   | 0.619   | -0.06 (-0.40, 0.28) | 0.730   | 0.00 (-0.04, 0.04)   | 0.956   | -0.06 (-0.39, 0.28) | 0.742   |
| Current/former smoker         | -0.06 (-0.08, -0.03) | <.001   | -0.09 (-0.33, 0.16) | 0.471   | -0.08 (-0.11, -0.05) | <.001   | -0.05 (-0.29, 0.20) | 0.705   |
| Charlson score, per 5         | 0.16 (0.10, 0.21)    | <.001   | 0.02 (-0.55, 0.58)  | 0.945   | 0.12 (0.06, 0.17)    | <.001   | 0.05 (-0.51, 0.61)  | 0.856   |
| HTN                           | 0.07 (0.01, 0.14)    | 0.027   | 0.34 (-0.56, 1.24)  | 0.456   | 0.01 (-0.05, 0.08)   | 0.675   | 0.21 (-0.69, 1.12)  | 0.638   |
| CKD                           | 0.37 (0.26, 0.48)    | <.001   | 1.61 (0.51, 2.70)   | 0.004   | 0.15 (0.04, 0.26)    | 0.008   | 1.49 (0.40, 2.59)   | 0.007   |
| Dyslipidemia                  | -0.05 (-0.12, 0.02)  | 0.177   | 0.15 (-0.74, 1.04)  | 0.741   | -0.04 (-0.11, 0.03)  | 0.220   | 0.07 (-0.81, 0.96)  | 0.870   |
| DM                            | 0.05 (-0.03, 0.13)   | 0.228   | -0.16 (-0.99, 0.68) | 0.711   | 0.03 (-0.05, 0.11)   | 0.501   | -0.20 (-1.03, 0.63) | 0.632   |
| Stroke                        | 0.07 (-0.06, 0.19)   | 0.277   | 1.22 (0.21, 2.22)   | 0.020   | 0.05 (-0.07, 0.17)   | 0.443   | 1.11 (0.10, 2.11)   | 0.033   |
| MI                            | 0.09 (-0.02, 0.19)   | 0.114   | 1.06 (0.16, 1.97)   | 0.023   | 0.06 (-0.05, 0.16)   | 0.272   | 0.96 (0.06, 1.87)   | 0.044   |
| AFib                          | 0.08 (-0.02, 0.19)   | 0.113   | -0.06 (-0.95, 0.83) | 0.890   | 0.04 (-0.06, 0.14)   | 0.446   | -0.03 (-0.91, 0.86) | 0.950   |
| Head trauma                   | 0.04 (-0.03, 0.11)   | 0.256   | 0.09 (-0.21, 0.39)  | 0.563   | 0.03 (-0.04, 0.10)   | 0.403   | 0.25 (-0.08, 0.58)  | 0.141   |
| Cancer                        | 0.04 (-0.03, 0.11)   | 0.308   | -0.45 (-1.22, 0.31) | 0.254   | 0.04 (-0.03, 0.11)   | 0.268   | -0.46 (-1.22, 0.30) | 0.239   |
| Chemotherapy for cancer tx    | 0.05 (-0.10, 0.19)   | 0.529   | -0.10 (-0.55, 0.35) | 0.673   | 0.01 (-0.15, 0.16)   | 0.920   | 0.29 (-0.26, 0.84)  | 0.31    |
| A+                            | 0.42 (0.36, 0.49)    | <.001   | 1.01 (0.13, 1.88)   | 0.020   | 0.52 (0.45, 0.59)    | <.001   | 1.19 (0.32, 2.05)   | 0.007   |

CU, cognitively unimpaired; MCI, mild cognitive impairment; A+, Elevated amyloid PET; AFib, atrial fibrillation; BAI total, Beck Anxiety Inventory; BDI dep, Beck Depression Inventory; BMI, body mass index; Chemotherapy for cancer tx, chemotherapy for those with a cancer diagnosis CKD, chronic kidney



disease; DM, diabetes mellitus; HTN, hypertension; MI, myocardial infarction. P-values are from a two-sided likelihood ratio test performed in a linear regression model. The p-values are not adjusted for multiple comparisons.
